# Supplementary material for: An erythrocyte membrane-derived nanosystem for efficient reversal of endothelial injury in sepsis
Source: Research Square preprint supplement (doi:10.21203/rs.3.rs-2980230/v1), 2023-05-29

**An erythrocyte membrane-derived nanosystem for** **efficient reversal of endothelial injury in sepsis**

**Authors**

Yao Zhang1†, Jian Li2†, Jing Qi1, Ziying Chen1, Kai Wang1, Chuanzheng Sun1*

Institutional addresses:

1. Department of Emergency, The Third Xiangya Hospital of Central South University, 138 Tongzipo Road, Changsha 410013, China.

2. Department of Blood Transfusion, The Third Xiangya Hospital, Central South University, Hunan, Changsha, China

* Correspondence to Chuanzheng Sun, Department of Emergency, The Third Xiangya Hospital of Central South University, 138 Tongzipo Road, Changsha 410013, China. E-mail address: sunchuanzheng@csu.edu.cn

**Affiliations**

1. Department of Emergency, The Third Xiangya Hospital of Central South University, 138 Tongzipo Road, Changsha 410013, China.

* Correspondence to Chuanzheng Sun, Department of Emergency, The Third Xiangya Hospital of Central South University, 138 Tongzipo Road, Changsha 410013, China. E-mail address: sunchuanzheng@csu.edu.cn

† Contributed equally.

**Supplementary Information**

**Fig S1**


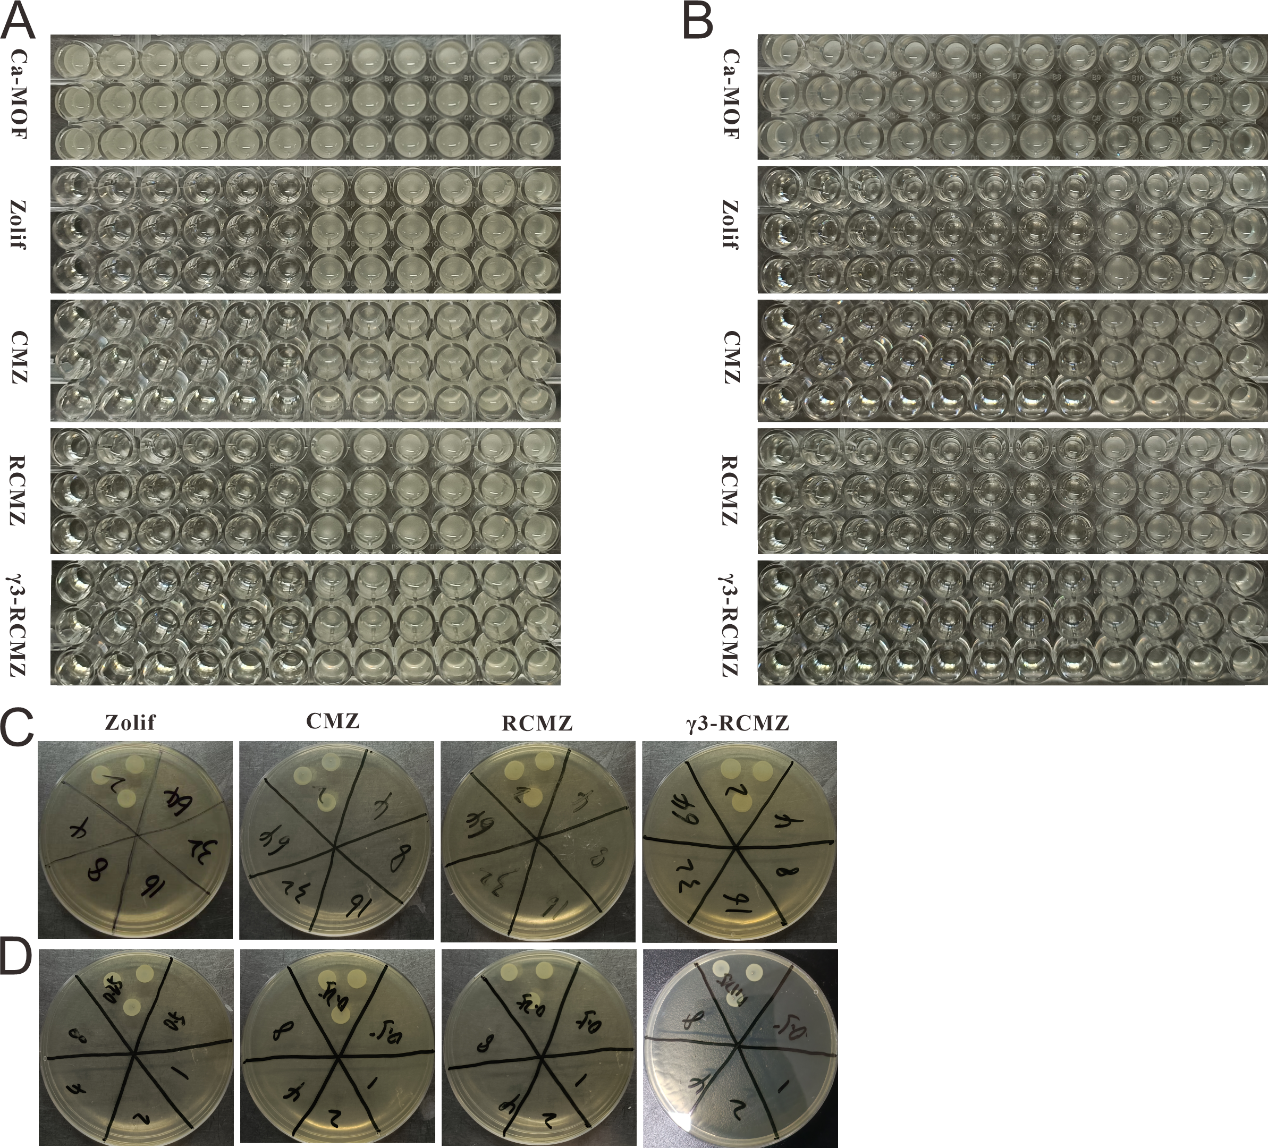

Supplement: Supplementary file 1 [file 286383c5ebc16a1c69e9e05c.docx]
